# Supplementary material
Source: PubMed Central journal article supplement (PMC8632907)
Supplement: 41431_2021_946_MOESM2_ESM.pdf [file 41431_2021_946_MOESM2_ESM.pdf]

| Sequence ID        | Start | Alignment                                                  | End | Organism                      |
|--------------------|-------|------------------------------------------------------------|-----|-------------------------------|
|                    |       | 1 50 100 150 200 * 250 300 350 400 450 500 550 600 650 691 |     |                               |
| Q96QF7.1 (+)       | 1     |                                                            | 691 | Homo sapiens                  |
| NP_443189.1 (+)    | 1     |                                                            | 691 | Homo sapiens                  |
| BAG54533.1 (+)     | 1     |                                                            | 691 | Homo sapiens                  |
| XP_011529365.1 (+) | 29    |                                                            | 700 | Homo sapiens                  |
| EAX05284.1 (+)     | 1     |                                                            | 664 | Homo sapiens                  |
| XP_011529368.1 (+) | 31    |                                                            | 673 | Homo sapiens                  |
| XP_005593983.1 (+) | 1     |                                                            | 685 | Macaca fascicularis           |
| XP_011847462.1 (+) | 1     |                                                            | 691 | Mandrillus leucophaeus        |
| XP_005593978.1 (+) | 1     |                                                            | 712 | Macaca fascicularis           |
| XP_011731041.1 (+) | 1     |                                                            | 675 | Macaca nemestrina             |
| XP_033057187.1 (+) | 1     |                                                            | 745 | Trachypithecus francoisi      |
| XP_030790446.1 (+) | 1     |                                                            | 676 | Rhinopithecus roxellana       |
| XP_011916364.1 (+) | 23    |                                                            | 669 | Cercocebus atys               |
| XP_031516451.1 (+) | 21    |                                                            | 647 | Papio anubis                  |
| XP_025227630.1 (+) | 6     |                                                            | 625 | Theropithecus gelada          |
| XP_026307415.2 (+) | 14    |                                                            | 643 | Ptilocolobus tephrosceles     |
| XP_037844845.1 (+) | 66    |                                                            | 676 | Chlorocebus sabaeus           |
| XP_011798568.1 (+) | 1     |                                                            | 576 | Colobus angolensis pall...    |
| XP_024096934.1 (+) | 137   |                                                            | 635 | Pongo abelii                  |
| XP_018874375.2 (+) | 1     |                                                            | 613 | Gorilla gorilla gorilla       |
| XP_017720151.1 (+) | 1     |                                                            | 472 | Rhinopithecus bieti           |
| XP_017720151.1 (+) | 62    |                                                            | 244 | Rhinopithecus bieti           |
| XP_032613051.1 (+) | 236   |                                                            | 619 | Hylobates moloch              |
| XP_032613052.1 (+) | 202   |                                                            | 585 | Hylobates moloch              |
| XP_030662368.1 (+) | 308   |                                                            | 677 | Nomascus leucogenys           |
| XP_032111825.1 (+) | 20    |                                                            | 662 | Sapajus apella                |
| XP_024208734.1 (+) | 292   |                                                            | 707 | Pan troglodytes               |
| NP_001258603.1 (+) | 292   |                                                            | 707 | Pan troglodytes               |
| XP_010329235.1 (+) | 150   |                                                            | 622 | Saimiri boliviensis bolivi... |
| XP_014650356.1 (+) | 75    |                                                            | 422 | Ceratotherium simum sim...    |
| XP_008069111.2 (+) | 108   |                                                            | 427 | Carlito syrichta              |
| XP_012498337.1 (+) | 23    |                                                            | 369 | Propithecus coquereli         |
| XP_012591639.1 (+) | 24    |                                                            | 428 | Microcebus murinus            |
| EFB13342.1 (+)     | 1     |                                                            | 348 | Ailuropoda melanoleuca        |
| XP_021575605.1 (+) | 64    |                                                            | 400 | Ictidomys tridecemlineatus    |
| XP_032187748.1 (+) | 53    |                                                            | 472 | Mustela erminea               |
| XP_032187749.1 (+) | 2     |                                                            | 417 | Mustela erminea               |
| XP_012591642.1 (+) | 101   |                                                            | 425 | Microcebus murinus            |
| XP_004475871.1 (+) | 69    |                                                            | 393 | Dasybus novemcinctus          |
| XP_023590468.1 (+) | 123   |                                                            | 453 | Trichechus manatus lati...    |
| XP_014584446.1 (+) | 4     |                                                            | 422 | Equus caballus                |
| XP_032187747.1 (+) | 61    |                                                            | 480 | Mustela erminea               |
| XP_012903676.1 (+) | 2     |                                                            | 417 | Mustela putorius furo         |
| XP_015357064.1 (+) | 64    |                                                            | 387 | Marmota marmota marm...       |
| XP_023489310.1 (+) | 16    |                                                            | 425 | Equus caballus                |
| XP_014584447.1 (+) | 33    |                                                            | 358 | Equus caballus                |
| XP_026341579.1 (+) | 51    |                                                            | 417 | Ursus arctos horribilis       |
| XP_014693167.1 (+) | 94    |                                                            | 421 | Equus asinus                  |
| XP_014693169.1 (+) | 33    |                                                            | 358 | Equus asinus                  |
| XP_032187746.1 (+) | 76    |                                                            | 493 | Mustela erminea               |
| XP_027791642.1 (+) | 88    |                                                            | 411 | Marmota flaviventris          |
| XP_012903675.1 (+) | 61    |                                                            | 480 | Mustela putorius furo         |
| XP_004777304.2 (+) | 76    |                                                            | 493 | Mustela putorius furo         |
| XP_032722612.1 (+) | 62    |                                                            | 479 | Lontra canadensis             |
| XP_022380135.1 (+) | 82    |                                                            | 415 | Enhydra lutris kenyonii       |
| XP_038306204.1 (+) | 96    |                                                            | 418 | Canis lupus familiaris        |
| XP_005641536.1 (+) | 96    |                                                            | 418 | Canis lupus familiaris        |
| XP_026268374.1 (+) | 21    |                                                            | 332 | Urocitellus parryii           |
| XP_030876478.1 (+) | 51    |                                                            | 423 | Leptonychotes weddellii       |
| XP_032704755.1 (+) | 126   |                                                            | 567 | Lontra canadensis             |
| XP_032704755.1 (+) | 150   |                                                            | 214 | Lontra canadensis             |
| XP_032704755.1 (+) | 208   |                                                            | 270 | Lontra canadensis             |
| XP_008509197.1 (+) | 65    |                                                            | 398 | Equus przewalskii             |
| XP_019648951.1 (+) | 65    |                                                            | 437 | Ailuropoda melanoleuca        |
| XP_007117922.3 (+) | 135   |                                                            | 456 | Physeter catodon              |
| XP_013831874.1 (+) | 68    |                                                            | 388 | Capra hircus                  |
| XP_025838678.1 (+) | 28    |                                                            | 421 | Vulpes vulpes                 |
| XP_004396700.1 (+) | 73    |                                                            | 415 | Odobenus rosmarus div...      |
| KAF3816128.1 (+)   | 2     |                                                            | 427 | Mirounga leonina              |
| XP_035962036.1 (+) | 23    |                                                            | 426 | Halichoerus grypus            |
| XP_007957143.1 (+) | 95    |                                                            | 441 | Orycteropus afer afer         |
| XP_023104875.1 (+) | 19    |                                                            | 421 | Felis catus                   |
| XP_023104875.1 (+) | 104   |                                                            | 138 | Felis catus                   |
| XP_023104875.1 (+) | 94    |                                                            | 110 | Felis catus                   |
| XP_007183690.1 (+) | 57    |                                                            | 379 | Balaenoptera acutorostr...    |
| XP_019284260.1 (+) | 53    |                                                            | 456 | Panthera pardus               |
| XP_019284260.1 (+) | 139   |                                                            | 173 | Panthera pardus               |
| XP_019284260.1 (+) | 129   |                                                            | 143 | Panthera pardus               |
| XP_007461649.1 (+) | 122   |                                                            | 444 | Lipotes vexillifer            |
| XP_034884529.1 (+) | 6     |                                                            | 297 | Mirounga leonina              |
| XP_021535461.1 (+) | 23    |                                                            | 400 | Neomonachus schauins...       |
| XP_025708840.1 (+) | 73    |                                                            | 415 | Callorhinus ursinus           |
| XP_008710464.1 (+) | 6     |                                                            | 290 | Ursus maritimus               |
| ELW48656.1 (+)     | 60    |                                                            | 386 | Tupaia chinensis              |
| XP_032448104.1 (+) | 6     |                                                            | 315 | Lynx canadensis               |
| XP_023104874.1 (+) | 66    |                                                            | 469 | Felis catus                   |
| XP_023104874.1 (+) | 152   |                                                            | 186 | Felis catus                   |
| XP_023104874.1 (+) | 142   |                                                            | 158 | Felis catus                   |
| XP_006158123.1 (+) | 100   |                                                            | 426 | Tupaia chinensis              |
| XP_006050883.1 (+) | 91    |                                                            | 417 | Bubalus bubalis               |
| XP_026949383.1 (+) | 100   |                                                            | 422 | Lagenorhynchus obliqui...     |
| XP_030706639.1 (+) | 100   |                                                            | 422 | Globicephala melas            |
| XP_024614501.1 (+) | 34    |                                                            | 353 | Neophocaena asiaeorie...      |
| XP_007089194.1 (+) | 64    |                                                            | 504 | Panthera tigris altaica       |
| XP_007089194.1 (+) | 152   |                                                            | 186 | Panthera tigris altaica       |
| XP_007089194.1 (+) | 142   |                                                            | 156 | Panthera tigris altaica       |
| TEA12916.1 (+)     | 82    |                                                            | 402 | Sousa chinensis               |
| XP_033705402.1 (+) | 102   |                                                            | 422 | Tursiops truncatus            |
| XP_035581523.1 (+) | 73    |                                                            | 415 | Zalophus californianus        |
| XP_032474806.1 (+) | 36    |                                                            | 355 | Phocoena sinus                |
| XP_026909464.1 (+) | 66    |                                                            | 469 | Acinonyx jubatus              |
| XP_026909464.1 (+) | 152   |                                                            | 186 | Acinonyx jubatus              |
| XP_026909464.1 (+) | 142   |                                                            | 158 | Acinonyx jubatus              |
| XP_027951279.1 (+) | 22    |                                                            | 364 | Eumetopias jubatus            |
| XP_022416761.1 (+) | 101   |                                                            | 423 | Delphinapterus leucas         |
| XP_032249787.1 (+) | 6     |                                                            | 295 | Phoca vitulina                |
| TKC37507.1 (+)     | 43    |                                                            | 365 | Monodon monoceros             |
| VFV43478.1 (+)     | 6     |                                                            | 356 | Lynx pardinus                 |
| XP_029096027.1 (+) | 73    |                                                            | 395 | Monodon monoceros             |
| XP_006868618.1 (+) | 134   |                                                            | 469 | Chrysochloris asiatica        |
| XP_027819489.1 (+) | 67    |                                                            | 388 | Ovis aries                    |
| XP_012863775.1 (+) | 54    |                                                            | 363 | Echinops telfairi             |
| XP_011962286.1 (+) | 100   |                                                            | 421 | Ovis aries                    |
| XP_008589296.1 (+) | 25    |                                                            | 339 | Galeopterus variegatus        |
